# Enhanced Synthesis and Diminished Degradation of Hydrogen Sulfide in Experimental Colitis: A Site-Specific, Pro-Resolution Mechanism

Kyle L. Flannigan<sup>1</sup>, Jose G. P. Ferraz<sup>2</sup>, Rui Wang<sup>3</sup>, John L. Wallace<sup>1,2\*</sup>

**1** Farncombe Family Digestive Health Research Institute, McMaster University, Hamilton, Ontario, Canada, **2** Inflammation Research Network, University of Calgary, Calgary, Alberta, Canada, **3** Department of Biology, Lakehead University, Thunder Bay, Ontario, Canada

## Abstract

Hydrogen sulfide (H<sub>2</sub>S) is produced throughout the gastrointestinal tract, and it contributes to maintenance of mucosal integrity, resolution of inflammation, and repair of damaged tissue. H<sub>2</sub>S synthesis is elevated in inflamed and damaged colonic tissue, but the enzymatic sources of that synthesis are not completely understood. In the present study, the contributions of three enzymatic pathways to colonic H<sub>2</sub>S synthesis were determined, with tissues taken from healthy rats and rats with colitis. The ability of the colonic tissue to inactivate H<sub>2</sub>S was also determined. Colonic tissue from rats with hapten-induced colitis produced significantly more H<sub>2</sub>S than tissue from healthy controls. The largest source of the H<sub>2</sub>S synthesis was the pathway involving cysteine amino transferase and 3-mercaptopyruvate sulfurtransferase (an  $\alpha$ -ketoglutarate-dependent pathway). Elevated H<sub>2</sub>S synthesis occurred specifically at sites of mucosal ulceration, and was not related to the extent of granulocyte infiltration into the tissue. Inactivation of H<sub>2</sub>S by colonic tissue occurred rapidly, and was significantly reduced at sites of mucosal ulceration. This correlated with a marked decrease in the expression of sulfide quinone reductase in these regions. Together, the increased production and decreased inactivation of H<sub>2</sub>S at sites of mucosal ulceration would result in higher H<sub>2</sub>S levels at these sites, which promotes resolution of inflammation and repair of damaged tissue.

**Citation:** Flannigan KL, Ferraz JGP, Wang R, Wallace JL (2013) Enhanced Synthesis and Diminished Degradation of Hydrogen Sulfide in Experimental Colitis: A Site-Specific, Pro-Resolution Mechanism. PLoS ONE 8(7): e71962. doi:10.1371/journal.pone.0071962

**Editor:** Fabio Cominelli, CWRU/UH Digestive Health Institute, United States of America

**Received:** June 14, 2013; **Accepted:** July 6, 2013; **Published:** August 5, 2013

**Copyright:** © 2013 Flannigan et al. This is an open-access article distributed under the terms of the Creative Commons Attribution License, which permits unrestricted use, distribution, and reproduction in any medium, provided the original author and source are credited.

**Funding:** The work described in this paper was supported by the Crohn's and Colitis Foundation of Canada and the Canadian Institutes of Health Research. The funders had no role in study design, data collection and analysis, decision to publish, or preparation of the manuscript.

**Competing Interests:** The authors have declared that no competing interests exist.

\* E-mail: altapharm@hotmail.com

## Introduction

Hydrogen sulfide is produced in virtually every organ system in the body [1,2] and can modulate a variety of physiological processes, including vasodilation [3], neurotransmission [4], nociception [5,6] and inflammation [7–9]. Based on these observations, a number of H<sub>2</sub>S-releasing therapeutic agents are in development for a wide range of disorders [8,10–17]. The importance of H<sub>2</sub>S in the gastrointestinal tract is highlighted by its ability to regulate intestinal smooth muscle function [18,19] and epithelial secretion [20–22], as well as playing important roles in mucosal defence [14,23–26]. H<sub>2</sub>S can enhance ulcer healing [27] and promote the resolution of colitis [25,28,29]. In recent years it has become clear that H<sub>2</sub>S is an important substrate for mitochondrial respiration, driving production of adenosine triphosphate, particularly in circumstances of reduced oxygen concentrations [30]. Colonocytes are particularly well adapted for using H<sub>2</sub>S as an energy source [31,32], and may act as a 'metabolic barrier', limiting penetration of bacteria-derived H<sub>2</sub>S into the mucosa [26]. There is also evidence that during hypoxia, mitochondrial H<sub>2</sub>S metabolism may underlie the ability of this gasotransmitter to reduce reactive oxygen metabolite-mediated tissue injury [33–35]. Such effects could contribute to the ability of H<sub>2</sub>S to protect the gastrointestinal mucosa from injury and to promote healing [26].

The majority of H<sub>2</sub>S production in mammalian tissue is enzymatically regulated, with the pyridoxal-5'-phosphate (P5P)-dependent enzymes cystathionine-beta-synthase (CBS) and cystathionine-gamma-lyase (CSE) being the most extensively studied [1]. During a bout of hapten-induced colitis in rats, the capacity of colonic tissue to produce H<sub>2</sub>S is substantially increased, in parallel with the degree of mucosal inflammation [25]. The H<sub>2</sub>S produced in this setting exerts significant beneficial effects in terms of reducing inflammation and enhancing healing of the ulcerated tissue [25]. Based on pharmacological studies (i.e., using inhibitors of CBS and CSE), CBS appeared to account for the majority of the observed increase in colonic H<sub>2</sub>S synthesis during colitis [25]. However, administration of inhibitors of both CBS and CSE did not completely abolish colonic H<sub>2</sub>S production, raising the possibility that there may be other sources of H<sub>2</sub>S synthesis in the colon [25]. We previously reported that enteric bacteria did not account for a significant portion of what we have measured as colonic tissue H<sub>2</sub>S synthesis [36].

A third enzymatic pathway for H<sub>2</sub>S synthesis, which does not require P5P as a co-factor, was identified in the brain of CBS-deficient mice by Shibuya et al. [37] (Figure 1). Cysteine aminotransferase (CAT), which requires  $\alpha$ -ketoglutarate as a co-factor, converts L-cysteine into 3-mercaptopyruvate, which can then be converted by mercaptopyruvate sulfurtransferase (3MST)

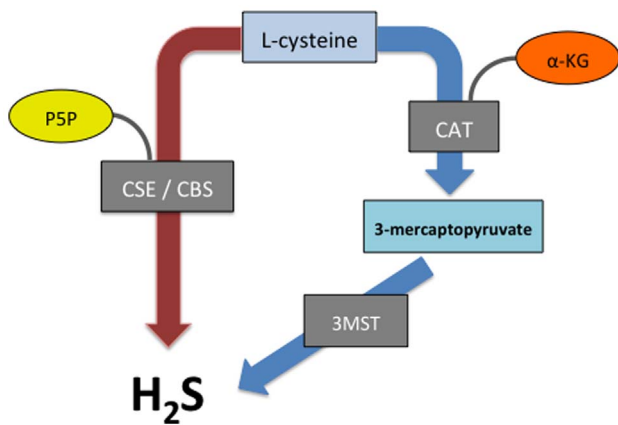

**Figure 1. Major pathways of colonic hydrogen sulfide (H<sub>2</sub>S) synthesis.** Hydrogen sulfide can be produced from L-cysteine through at least three enzymatic pathways. The pyridoxal-5'-phosphate (P5P)-dependent enzymes, cystathionine- $\beta$ -synthase (CBS) and cystathionine- $\gamma$ -lyase (CSE), can metabolize L-cysteine, resulting in the generation of H<sub>2</sub>S. L-cysteine can also be converted to 3-mercaptopyruvate via the enzyme cysteine aminotransferase (CAT), the activity of which is depending upon the presence of  $\alpha$ -ketoglutarate ( $\alpha$ -KG). Mercaptopyruvate transferase (3MST), which is largely localized to mitochondria, can metabolize 3-mercaptopyruvate to generate H<sub>2</sub>S. doi:10.1371/journal.pone.0071962.g001

to H<sub>2</sub>S and pyruvate [37,38]. This pathway has also been shown to contribute to H<sub>2</sub>S synthesis in the vascular endothelium of the thoracic aorta [37,38].

In the present study, we examined the contribution of the CAT-3MST pathway and the two P5P-dependent pathways to H<sub>2</sub>S synthesis in the healthy and inflamed colon. We also attempted to determine the relative contributions of the ulcerated versus non-ulcerated colonic mucosa to H<sub>2</sub>S synthesis, and we examined the capacity of these tissues to inactivate H<sub>2</sub>S. Our results demonstrate that there is a site-selective enhancement of H<sub>2</sub>S synthesis, as well as decreased H<sub>2</sub>S inactivation, in the regions of ulceration. Such changes are consistent with an important role of this gasotransmitter in repair of injury and resolution of inflammation.

## Methods and Materials

### Animals

Male, Wistar rats (from Charles River Breeding Farms, St-Constant, QC, Canada) were housed in plastic cages and maintained under controlled temperature (20°C), humidity (60%–70%), and light cycle (12 h:12 h light-dark). The rats were fed standard laboratory chow and water *ad libitum*. All experimental protocols were approved by the Animal Research Ethics Board at McMaster University, and adhered to the guidelines established by the Canadian Council on Animal Care.

Mice with a targeted disruption of the CSE gene [39] and from age-matched (16 weeks), wild type littermates on the C57BL/6J X 129SvEv background were housed in the animal care facility at Lakehead University (experimental protocols were approved by the Animal Care Committee of Lakehead University). Heterozygous CBS deficient (CBS+/-) mice on the C57BL/6 background were obtained from Jackson Laboratories (Bar Harbor, ME, USA) and bred and maintained in the animal care facility at McMaster University. Homozygous CBS deficient mice (CBS-/-) display significant growth retardation and rarely survive past 5 weeks of age, therefore CBS+/- mice were used [40]. Age-matched (20 weeks), wild type (CBS +/+) littermates were used as controls.

### Induction of colitis

Colitis was induced in conventionally housed rats using dinitrobenzene sulfonic acid (DNBS) [41], a modified version of the original trinitrobenzene sulfonic acid model of colitis [42]. Rats were given 30 mg DNBS intracolonicly in 0.5 mL of 50% ethanol. Groups of rats (n $\geq$ 4) were euthanized 6 h to 28 days after DNBS administration for determination of H<sub>2</sub>S synthesis. Colonic inflammation was assessed by the measurement of myeloperoxidase (MPO) activity, using a method modified [43] from that described by Bradley et al. [44]. MPO is an enzyme found primarily in the azurophilic granules of neutrophils, and has been used extensively as a quantitative index of granulocyte infiltration.

### Separation of colonic mucosa and muscularis

After the rats were euthanized, the colons were excised, opened along the mesenteric border, washed thoroughly to remove fecal material and immediately placed in ice-cold potassium phosphate buffer, pH 8.0 (12% w/v). Sections of the distal colon were visualized under a dissecting microscope and pinned along the edges of the sections with care taken to minimize damage to the tissue. The border between the mucosa and smooth muscle layer was identified, then these two layers were gently separated using forceps, as described by Lowie et al. [45], and immediately snap-frozen in liquid nitrogen (for measurements of H<sub>2</sub>S synthesis) or fixed in neutral-buffered formalin (for histology). In rats that had received DNBS, the mucosal and smooth muscle layers were separated in the same manner, then sections were cut at the border between the ulcer and the immediately adjacent non-ulcerated tissue, yielding separate mucosal and smooth muscle sections from both ulcerated and non-ulcerated areas. The tissues that were fixed in formalin were processed and stained with hematoxylin & eosin for microscopic examination, to confirm separation of the mucosal layer from the smooth muscle.

### Measurement of H<sub>2</sub>S synthesis

The capacity of tissue to produce H<sub>2</sub>S was measured from homogenized tissue in the presence of exogenous substrate and/or inhibitors using a modified version of a previously described zinc-trapping assay [14,46]. Production of H<sub>2</sub>S via the CAT-3MST pathway was determined using the substrate  $\alpha$ -ketoglutarate ( $\alpha$ -KG; 100  $\mu$ M unless otherwise stated) and the competitive CAT inhibitor L-aspartate, and O-carboxymethyl-hydroxylamine hemihydrochloride (CHH; an inhibitor of aminotransferases, including CAT). Addition of the substrate, L-cysteine (10 mM), was necessary for detection of H<sub>2</sub>S synthesis (P5P-dependent or -independent) by colonic tissue. H<sub>2</sub>S synthesis via CSE and CBS required the presence of P5P (2 mM unless otherwise stated), while that via CAT/3MST required  $\alpha$ -KG.

### Measurement of H<sub>2</sub>S inactivation

The ability of colonic tissue to inactivate H<sub>2</sub>S, such as through metabolism and/or sequestration, was measured using a modified version of the above-mentioned zinc-trapping assay. Instead of including L-cysteine as a substrate for H<sub>2</sub>S synthesis, vials containing either tissue homogenates or buffer were 'spiked' with 33  $\mu$ L of 30  $\mu$ M NaHS, the same H<sub>2</sub>S-releasing compound that is used to generate the standard curve for the H<sub>2</sub>S assay. The samples were then incubated for 5–90 min in a 37°C shaking water bath, after which trichloroacetic acid (TCA; 50%; 0.4 mL) was injected into the reaction mixture through the serum cap to halt the reaction. The vials were then transferred to a 50°C shaking water bath for 60 min to allow for the trapping of evolved H<sub>2</sub>S by the zinc acetate. The greater the ability of a tissue to

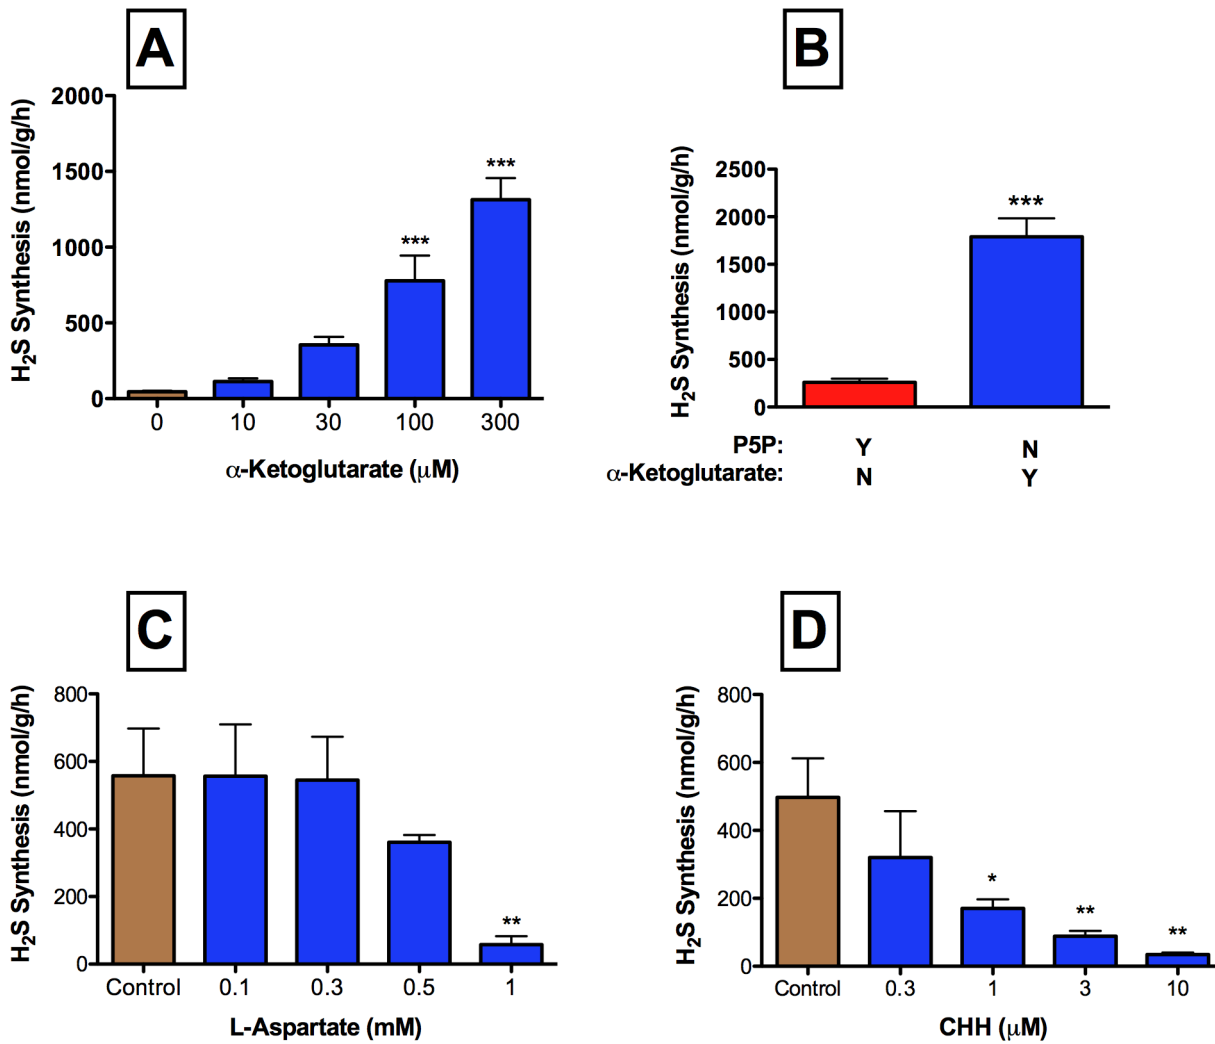

**Figure 2. H<sub>2</sub>S synthesis by healthy colonic tissue occurs via multiple pathways.** Panel A: In the absence of pyridoxal-5'-phosphate (P5P),  $\alpha$ -ketoglutarate increased the production of H<sub>2</sub>S in by colonic tissue in a concentration-dependent manner (\*\*\* $p$ <0.001 vs. the group with no  $\alpha$ -ketoglutarate added). Panel B: Maximal production of H<sub>2</sub>S from L-cysteine by the healthy colon was observed in the presence of 3 mM P5P or 300  $\mu$ M  $\alpha$ -ketoglutarate. The maximal production of H<sub>2</sub>S in the healthy colon in the presence of  $\alpha$ -ketoglutarate was markedly higher than the maximal production of H<sub>2</sub>S in the presence of P5P. Panel C: At a concentration of 1 mM, L-aspartate significantly inhibited H<sub>2</sub>S synthesis by healthy colonic tissue. Panel D: CHH (O-carboxymethyl-hydroxylamine hemihydrochloride) concentration-dependently inhibited  $\alpha$ -ketoglutarate-dependent colonic H<sub>2</sub>S synthesis. The reactions shown in Panels C and D were carried out in the absence of pyridoxal-5'-phosphate and presence of  $\alpha$ -ketoglutarate (100  $\mu$ M). In the absence of both P5P and  $\alpha$ -ketoglutarate there was no detectable H<sub>2</sub>S production. Each bar represents the mean  $\pm$  SEM of 4–6 rats (\* $p$ <0.05, \*\* $p$ <0.01, \*\*\* $p$ <0.001 vs. the control group). doi:10.1371/journal.pone.0071962.g002

metabolize/sequester H<sub>2</sub>S, the less H<sub>2</sub>S would be trapped in the zinc acetate and subsequently detected in the reaction with FeCl<sub>3</sub> and N,N-dimethyl-p-phenylene-diamine sulfate salt, which results in methylene blue formation. To determine the recovery of H<sub>2</sub>S in this assay in the absence of enzymatic activity, samples were treated in the same way, except that the TCA was added prior to addition of the NaHS. In this case, the amount of H<sub>2</sub>S recovered 30 min later was ~80% of that recovered if the NaHS was added to vials not containing any tissue. In addition, in some experiments, potassium cyanide (1 mM) was added to the tissue samples immediately prior to the addition of NaHS to abolish mitochondrial activity and 30 min later the effects on recovery of H<sub>2</sub>S were determined.

### Expression of H<sub>2</sub>S producing and catabolizing enzymes

Western blot analysis was used to determine colonic expression of CBS, CSE, CAT, 3MST, and sulfide quinone reductase (SQR) in samples from rats with colitis and healthy control rats. Colonic tissue was processed and blots were prepared as previously described [27]. Proteins were separated on 4–20% gradient polyacrylamide gels. Rabbit polyclonal anti-CSE (1:200), anti-CBS (1:800), anti-CAT (1:800), anti-3MST (1:200), and anti-SQR antibodies (1:500) were used. Enzyme expression was visualized using a secondary anti-rabbit IgG antibody conjugated to horseradish peroxidase (1:1000) and an enhanced chemiluminescence detection kit on a Chemi-doc gel imaging system (Bio-Rad). The intensity of the bands was determined and analyzed using ImageLab 2.0 software (Bio-Rad). The expression of each enzyme was normalized to the expression of  $\beta$ -actin.

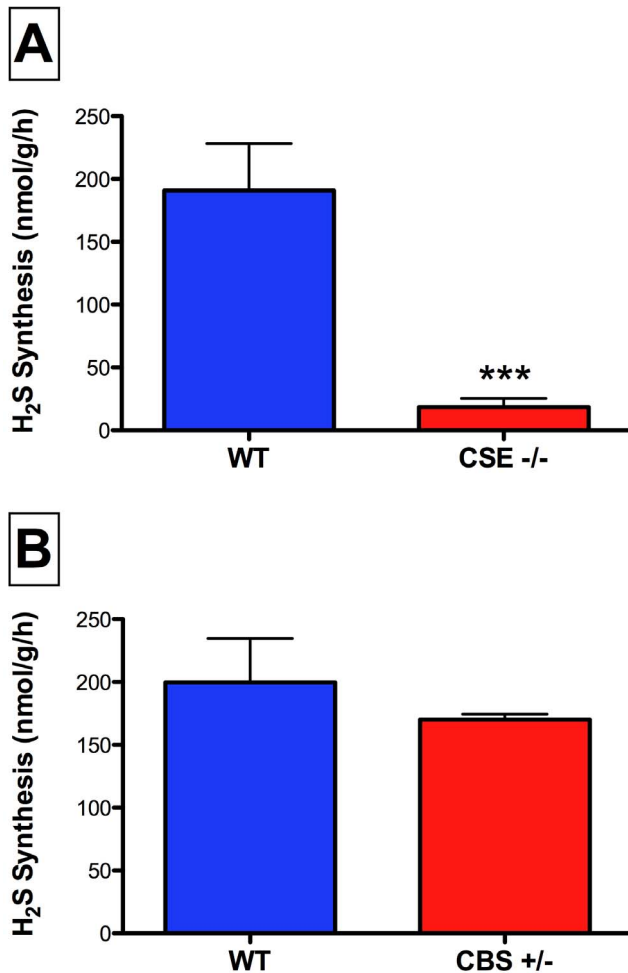

**Figure 3. Colonic H<sub>2</sub>S synthesis in CSE-deficient (CSE<sup>-/-</sup>) and CBS heterozygous (CBS<sup>+/-</sup>) mice.** Panel A: In the presence of P5P, colonic tissue from CSE-deficient mice produced significantly less H<sub>2</sub>S from L-cysteine than tissue from wild type mice (\*\*\*)*p*<0.001). Panel B: There was no difference in the ability of colonic tissue from CBS heterozygous mice to produce H<sub>2</sub>S from L-cysteine in the presence P5P when compared to colonic tissue from wild type controls. Each bar represents the mean  $\pm$  SEM of 4–7 mice. doi:10.1371/journal.pone.0071962.g003

## Materials

Isoflurane was obtained from Abbott Laboratories (Montreal, QC, Canada). 4–20% gradient polyacrylamide gels were purchased from Bio-Rad Laboratories (Mississauga, ON, Canada). Anti-CSE, anti-CAT, and anti-SQR primary antibodies were obtained from Proteintech (Chicago, IL, USA). Anti-CBS and anti-3MST primary antibodies were obtained from Santa Cruz Biotechnology Inc. (Santa Cruz, CA, USA). The secondary anti-rabbit IgG antibody conjugated to horseradish peroxidase was purchased from Invitrogen (Camarillo, CA, USA). The enhanced chemiluminescence detection kit was obtained from GE Healthcare (Baie d'Urfe QC, Canada). All other reagents were purchased from Sigma-Aldrich Co. (Oakville, ON, Canada).

## Statistical analysis

All data are expressed as the mean  $\pm$  SEM. Groups of data were compared to one another using a one-way analysis of variance and the Neuman-Keuls test. An associated probability of less than 5% was considered significant.

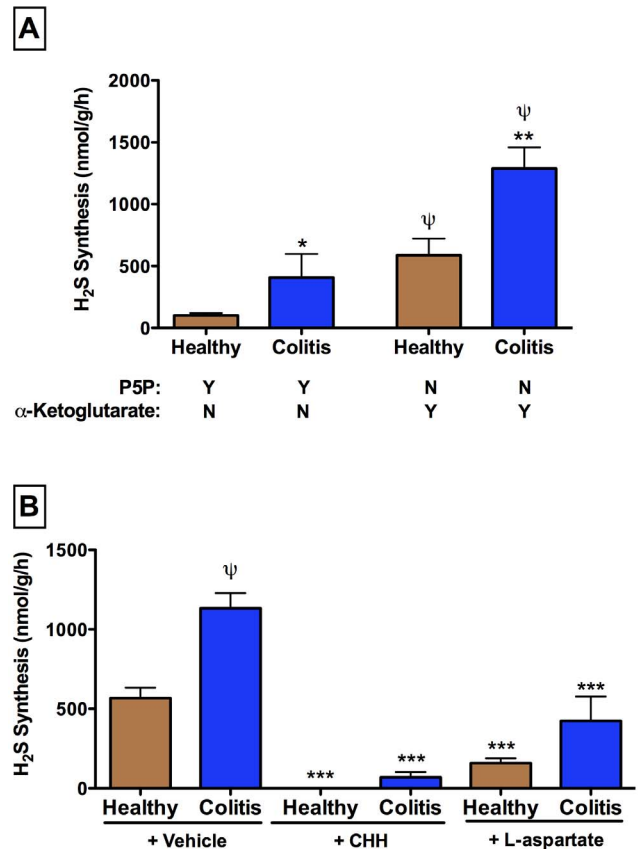

**Figure 4. Sources of H<sub>2</sub>S synthesis in the healthy and inflamed rat colon.** Panel A: In the presence of P5P and absence of  $\alpha$ -ketoglutarate, colonic tissue from rats with colitis (3 days post-DNBS administration) synthesized significantly more H<sub>2</sub>S than that from healthy rats (\**p*<0.05 vs. corresponding healthy group). Likewise, synthesis of H<sub>2</sub>S by colonic tissue from rats with colitis was significantly greater than that from healthy rats when the assay was performed in the presence of  $\alpha$ -ketoglutarate and the absence of P5P. For both healthy rats and rats with colitis, colonic H<sub>2</sub>S synthesis was significantly greater via the  $\alpha$ -ketoglutarate-dependent pathway than via the P5P-dependent pathways ( $\psi$ *p*<0.05). In the absence of both P5P and  $\alpha$ -ketoglutarate there was no detectable H<sub>2</sub>S production. Panel B:  $\alpha$ -ketoglutarate-dependent H<sub>2</sub>S synthesis by samples of colonic tissue from healthy rats and rats with colitis (3 days post-DNBS administration) was significantly inhibited by CHH (O-carboxymethyl-hydroxylamine hemihydrochloride) (10  $\mu$ M) and by L-aspartate (1 mM) (\*\*\*)*p*<0.001 vs. the corresponding vehicle-treated group; ( $\psi$ *p*<0.05) vs. the corresponding healthy group). Each bar represents the mean  $\pm$  SEM of 4–6 rats. doi:10.1371/journal.pone.0071962.g004

## Results

### Healthy colonic tissue produces H<sub>2</sub>S via the CAT-3MST pathway

Colonic H<sub>2</sub>S synthesis via the CBS/CSE pathways versus the CAT-3MST pathway could be delineated through inclusion or exclusion of the co-factors P5P and  $\alpha$ -KG (Figure 1). Healthy rat colonic tissue produced H<sub>2</sub>S in the absence of P5P and the presence of  $\alpha$ -KG, consistent with synthesis via the CAT-3MST pathway (Figure 2A). The amounts of H<sub>2</sub>S produced increased with the concentration of  $\alpha$ -KG.

To determine the relative contributions of the CBS/CSE versus the CAT-3MST pathways to colonic H<sub>2</sub>S synthesis in rats, we determined the optimal concentrations of co-factors (P5P and  $\alpha$ -KG, respectively) for each pathway, by performing concentration-



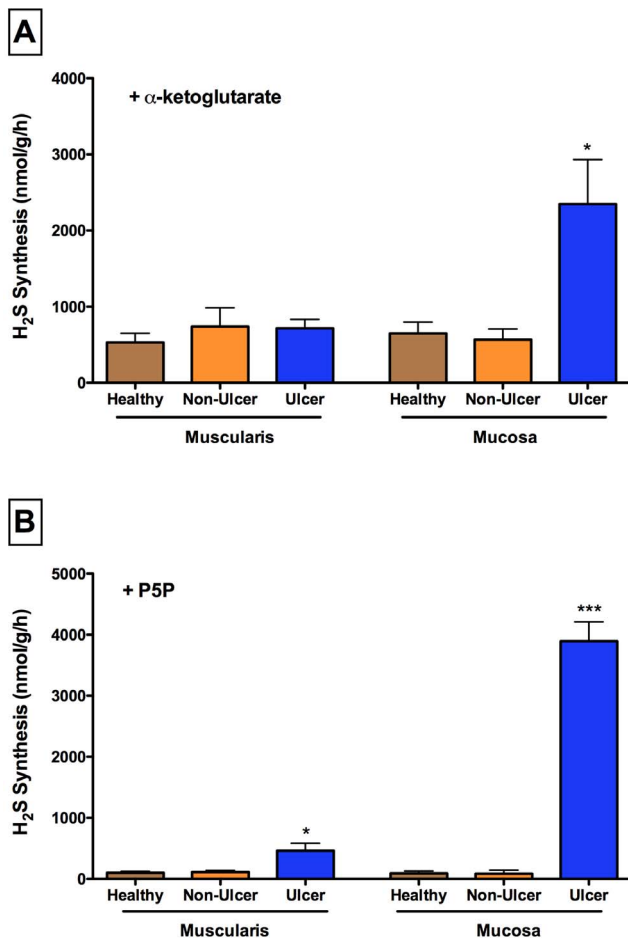

**Figure 5. H<sub>2</sub>S synthesis by compartments of healthy and damaged colon.** Panel A: The contributions of the mucosa and muscularis layers of the colon to H<sub>2</sub>S synthesis via the  $\alpha$ -ketoglutarate-dependent pathway. H<sub>2</sub>S synthesis by the ulcerated mucosa was markedly increased compared to that of adjacent, non-ulcerated mucosa and that of the healthy mucosa (\* $p < 0.05$ ). Panel B: The contributions of the mucosa and muscularis layers of the colon to H<sub>2</sub>S synthesis via the P5P-dependent pathways. H<sub>2</sub>S production by muscularis and mucosa from sites of ulceration were significantly greater than that from healthy tissue or tissue from non-ulcerated sites (\* $p < 0.05$ , \*\*\* $p < 0.001$ ). Each bar represents the mean  $\pm$  SEM of 4–6 rats. doi:10.1371/journal.pone.0071962.g005

response studies. Maximal production of H<sub>2</sub>S via the CBS/CSE pathways was observed with P5P at 3 mM (not shown), while maximal production of H<sub>2</sub>S via the CAT-3MST pathway was observed with  $\alpha$ -KG at 300  $\mu$ M (Fig. 2A). As shown in figure 2B, under these optimized conditions, the CAT-3MST pathway accounted for about 6-times as much colonic H<sub>2</sub>S synthesis as that produced via the CBS/CSE pathways ( $p < 0.001$ ).

Further evidence for colonic synthesis of H<sub>2</sub>S from the CAT-3MST pathway was provided by studies of inhibitors of this pathway in rats. Both L-aspartate and CHH, which inhibit CAT activity, significantly and concentration-dependently reduced  $\alpha$ -KG-dependent H<sub>2</sub>S synthesis by healthy colonic tissue (Figure 2C and D, respectively).

### CSE is the major contributor to P5P-dependent H<sub>2</sub>S synthesis in the healthy colon

To determine the main enzymes responsible for P5P-dependent H<sub>2</sub>S production in the colon we examined colonic H<sub>2</sub>S production

in CSE<sup>-/-</sup> and CBS<sup>+/-</sup> mice. Colonic H<sub>2</sub>S synthesis was reduced by  $\sim 90\%$  in CSE-deficient mice as compared to their wild-type littermates (Figure 3A). In contrast, despite having decreased expression of the CBS enzymes, colonic H<sub>2</sub>S production in CBS<sup>+/-</sup> mice was not significantly different from that in wild type mice (Figure 3B). These data suggest that CSE is the predominant source of P5P-dependent H<sub>2</sub>S synthesis by healthy mouse colon.

### H<sub>2</sub>S is produced via CAT-3MST in inflamed colon

A pilot time-course study demonstrated that the greatest granulocyte infiltration of the colon occurred at 3 days after DNBS administration (MPO activity in DNBS-treated rats averaged  $22.2 \pm 4.3$  U/mg, versus  $4.6 \pm 0.5$  U/mg in healthy controls;  $p < 0.05$ ). Colonic H<sub>2</sub>S synthesis was significantly elevated in samples from rats with colitis, both through the P5P-dependent pathways and the CAT/3MST pathway (Figure 4A). As in the case for colonic tissue from healthy rats, there was substantially greater H<sub>2</sub>S synthesis from the CAT/3MST pathway in tissue from rats with colitis than there was from the P5P-dependent pathways. The two inhibitors of CAT (CHH and L-aspartate) each substantially reduced  $\alpha$ -KG-dependent H<sub>2</sub>S synthesis by inflamed colonic tissue (Figure 4B).

### Ulcerated mucosa is the major site of elevated H<sub>2</sub>S production

H<sub>2</sub>S synthesis via CAT-3MST from the mucosa and muscularis layers of the colonic tissue from healthy rats was comparable (Figure 5A), as was the case for H<sub>2</sub>S synthesis via P5P-dependent pathways (Fig. 5B). However, the mucosa from sites of ulceration produced significantly more H<sub>2</sub>S via the CAT-3MST pathway (Fig. 5A) and the P5P-dependent pathways (Fig. 5B). H<sub>2</sub>S synthesis from samples of the muscularis layer were relatively low, though a significant increase in synthesis via the P5P-dependent pathways was observed when the tissue was from a region underlying a site of ulceration (Fig. 5B). H<sub>2</sub>S synthesis from mucosal or muscularis samples from rats with colitis, but taken from sites that were not ulcerated, was similar to that from samples taken from healthy controls. However, the elevated synthesis of H<sub>2</sub>S from tissues taken from sites of ulceration did not appear to be related to inflammation (e.g., granulocyte infiltration) at those sites. MPO activity, a marker of granulocyte infiltration, was comparable in samples of mucosa from sites of ulceration versus non-ulcerated sites ( $21.5 \pm 0.5$  U/mg versus  $17.8 \pm 2.0$  U/mg, respectively; ns), but significantly elevated versus healthy controls ( $5.1 \pm 0.5$  U/mg;  $p < 0.05$ ). The same was the case for samples of muscularis from sites of ulceration versus non-ulcerated sites ( $10.9 \pm 2.9$  U/mg vs.  $8.6 \pm 3.2$  U/mg, respectively; ns), in contrast to the significant elevation of MPO versus healthy controls ( $0.5 \pm 0.2$  U/mg;  $p < 0.05$ ).

### Increased expression of H<sub>2</sub>S-producing enzymes during colitis

Consistent with the predominance of CSE as a source of P5P-dependent H<sub>2</sub>S synthesis, expression of this enzyme was markedly up-regulated in inflamed colonic tissue as compared to tissue from healthy controls (Fig. 6A). Likewise, Western blots confirmed the presence of CAT (data not shown) and 3MST in the healthy and inflamed colon of rats (Fig. 6B), with a substantial increase in 3MST expression in inflamed colonic tissue (Fig. 6B). Interestingly, the increased expression of 3MST and CSE during colitis occurred at sites of mucosal ulceration, but not in non-ulcerated

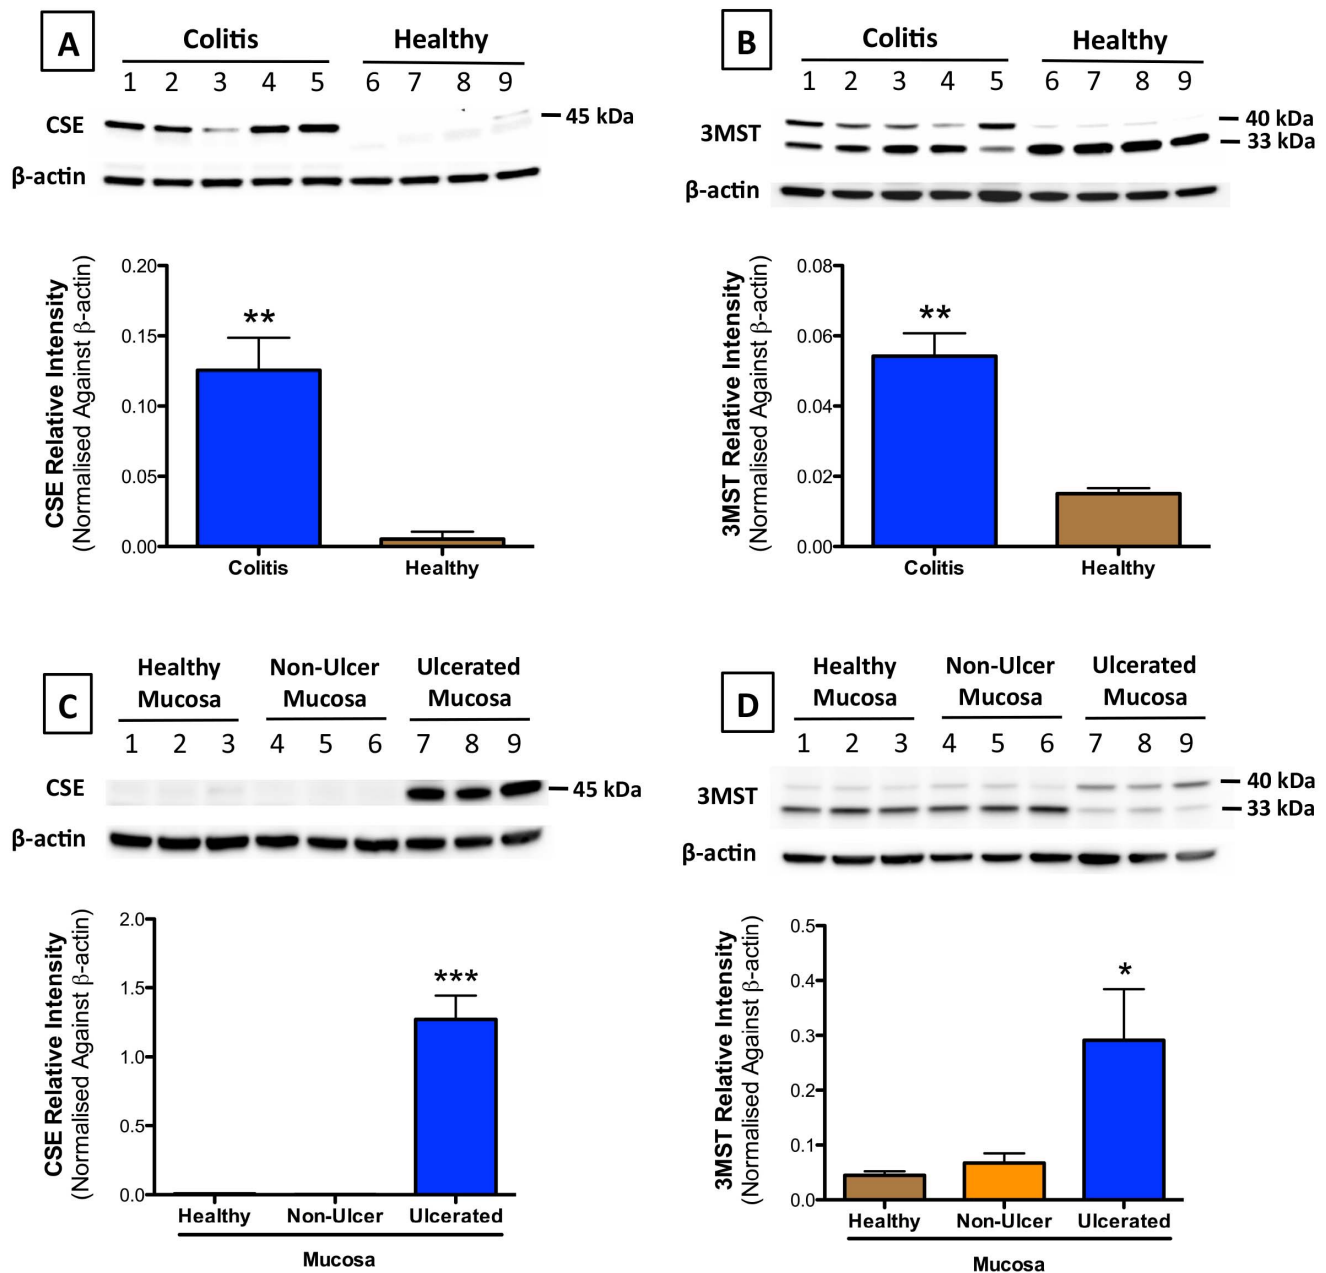

**Figure 6. Expression of 3MST and CSE in the healthy and damaged colon.** Each panel includes Western blots with an associated analysis of relative intensity of enzyme expression, normalized to  $\beta$ -actin expression. Panels A and B: The expression of CSE (A) and 3MST (B) were markedly increased in the colonic tissue from rats with colitis as compared to tissue from healthy controls (\*\* $p < 0.01$ ). Panels C and D: The expression of CSE (C) and 3MST (D) were significantly increased at sites of mucosal ulceration as compared to adjacent, non-ulcerated tissue and to tissue from healthy controls (\*\* $p < 0.001$  and \* $p < 0.05$ , respectively). Each bar represents the mean  $\pm$  SEM of 3–5 rats. doi:10.1371/journal.pone.0071962.g006

tissue from rats with colitis or in tissue from healthy controls (Fig. 6C and D).

#### H<sub>2</sub>S degradation is markedly reduced at sites of ulceration

Both the healthy and inflamed colon rapidly inactivated H<sub>2</sub>S *in vitro* (Figure 7A), but there was significantly less inactivation of H<sub>2</sub>S in samples from rats with colitis than in healthy controls. Approximately 20% of the H<sub>2</sub>S that was added to the samples could not be recovered, and presumably was bound to tissue.

Indeed, pretreatment of the tissue samples with potassium cyanide (1 mM) increased the recovery of H<sub>2</sub>S after 30 min of incubation substantially (to 56.7 $\pm$ 5.6% for tissue from healthy rats, and to 63.6 $\pm$ 4.6% for tissue from rats with colitis). This suggests that the majority of the decrease in recovery of H<sub>2</sub>S from the tissue samples was due to metabolic inactivation.

Inactivation of H<sub>2</sub>S was substantially reduced in mucosal samples taken from sites of ulceration than that from adjacent, non-ulcerated sites or from samples from healthy controls (Figure 7B). This reduced ability to inactivate H<sub>2</sub>S coincided with a significant reduction of the expression of SQR at sites of mucosal

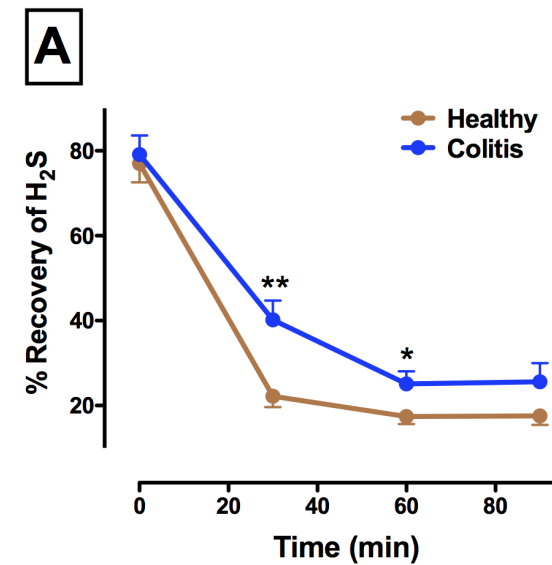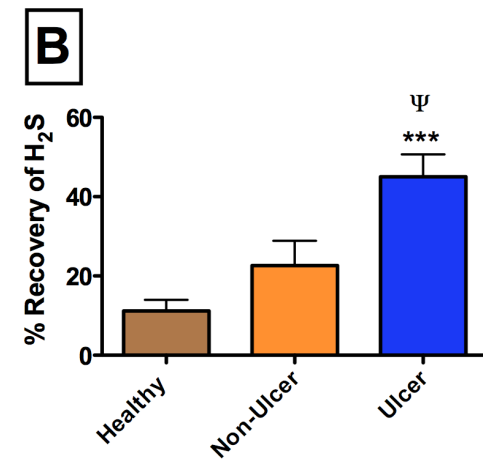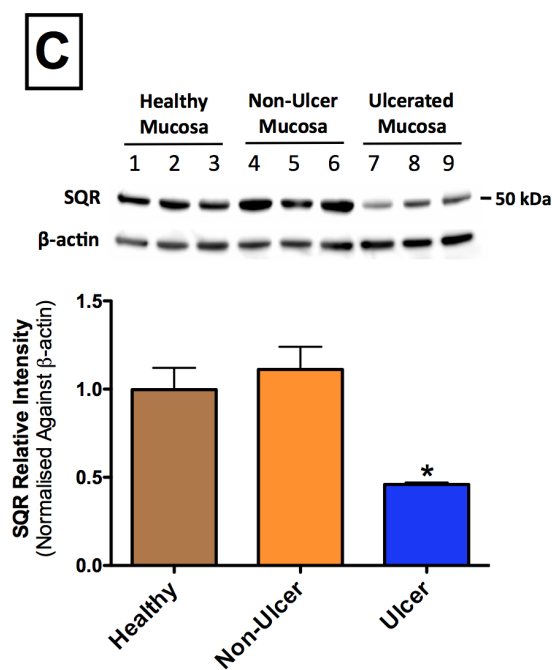

**Figure 7. Catabolism of H<sub>2</sub>S by healthy and ulcerated colonic tissue.** Panel A: Catabolism of H<sub>2</sub>S was significantly reduced in tissue from rats with colitis as compared tissue from healthy controls (\**p*<0.05, \*\**p*<0.01). Each point represents the mean ± SEM of 5–10 samples. Panel B: Catabolism of H<sub>2</sub>S was significantly reduced in mucosal tissue from sites of ulceration as compared to mucosal tissue from healthy controls (\*\**p*<0.001) and as compared to mucosal tissue from adjacent, non-ulcerated sites in rats with colitis (<sup>ψ</sup>*p*<0.05). Recovery of H<sub>2</sub>S was measured 30 min after addition of NaHS to the tissue samples. Panel C: Expression of sulfide quinone reductase (SQR) was significantly reduced (\**p*<0.05) at sites of ulceration as compared to adjacent, non-ulcerated mucosa and to tissue from healthy controls. Each bar represents the mean ± SEM of 5 rats. doi:10.1371/journal.pone.0071962.g007

ulceration when compared to immediately adjacent, non-ulcerated sites or to healthy controls (Figure 7C). No differences in inactivation of H<sub>2</sub>S were observed for muscularis samples from healthy rats or rats with colitis, and there were no differences in H<sub>2</sub>S recovery between muscularis samples taken from sites of ulcerated versus non-ulcerated sites (data not shown).

## Discussion

H<sub>2</sub>S is produced throughout the GI tract [47,48] and contributes to many digestive functions [49], including epithelial secretion [20–22], smooth muscle contraction [18,19] and mucosal defense [14,23–26,50]. H<sub>2</sub>S also promotes resolution of inflammation and repair of injury in the gastrointestinal tract and elsewhere [7,14,25,26,51]. In the present study we have demonstrated that colonic H<sub>2</sub>S synthesis does not occur solely through P5P-dependent pathways (CSE and CBS). Rather, a P5P-independent, α-KG-dependent pathway via the enzymes CAT and 3MST is the major source of H<sub>2</sub>S synthesis in both the healthy and inflamed colon. We also demonstrated that in colitis the ulcerated mucosa is the major site of both P5P-dependent and α-KG-dependent H<sub>2</sub>S synthesis and that this synthesis is not influenced by the extent of granulocyte infiltration into the tissue. Furthermore, inactivation of H<sub>2</sub>S occurs rapidly in colonic tissue (in the mucosa much more quickly than in muscle), but at a significantly lower rate in ulcerated colonic tissue than in tissue immediately adjacent to ulcers or in healthy colonic tissue. Moreover, increased expression of H<sub>2</sub>S-producing enzymes and decreased expression of the key H<sub>2</sub>S inactivating enzyme (SQR) were observed specifically at sites of mucosal ulceration, but not in mucosa immediately adjacent to ulcers or in the healthy mucosa. One explanation for the decrease in expression of SQR at sites of ulceration is that it is just a consequence of the tissue destruction at those sites. However, at these same sites we observed significant up-regulation of 3MST, which like SQR, is primarily localized to mitochondria.

Our observation that H<sub>2</sub>S synthesis was selectively up-regulated at sites of ulceration is consistent with an important role of this mediator in driving tissue repair [25,27,52]. We previously observed a marked up-regulation of CSE and CBS expression and a corresponding increase in H<sub>2</sub>S synthesis at the margins of gastric ulcers, which is the key area of re-epithelialization and angiogenesis that drive ulcer healing [27]. Administration of inhibitors of H<sub>2</sub>S synthesis resulted in delayed ulcer healing, while administration of H<sub>2</sub>S donors accelerated ulcer healing [27]. The healing of ulcers in the colon has similarly been shown to be enhanced by H<sub>2</sub>S donors [10,25,28,29]. It is well recognized that enzymes producing other mediators that promote ulcer healing, such as cyclooxygenase-2 and endothelial nitric oxide synthase, are also up-regulated at the margins of ulcers [53,54]. The trigger(s) for the elevated H<sub>2</sub>S synthesis at sites of ulceration are not yet

known, but one possibility is that local release of vascular endothelial growth factor could play an important role. Vascular endothelial growth factor is an important signal for ulcer healing in the gastrointestinal tract and has been shown to promote angiogenesis, a crucial step in ulcer healing [55], in part through induction of CSE and elevation of H<sub>2</sub>S synthesis [52]. Bacteria-derived signals may also be involved in triggering up-regulation of colonic H<sub>2</sub>S synthesis when there are breaches of the epithelial barrier.

The levels of H<sub>2</sub>S at any given site is dependent upon rates of synthesis and of catabolism. Thus, the reduced rates of inactivation of H<sub>2</sub>S that we observed at sites of ulceration would contribute to producing elevated local levels of H<sub>2</sub>S, further contributing to healing. In healthy colonic tissue H<sub>2</sub>S is rapidly degraded, mainly by oxidation to thiosulfate, and primarily through the enzymes SQR and rhodanese (thiosulfate transferase) [30,51,56–58]. SQR and rhodanese are highly expressed in the healthy colonic epithelium [30,51,56,59]. In vitro, colonic epithelial cells are capable of oxidizing H<sub>2</sub>S up to concentrations of 50 μM, via the mitochondrial sulfide oxidizing enzymes (59). The reduced inactivation of H<sub>2</sub>S at sites of ulceration may be attributable to the observed, marked reduction of SQR expression specifically at sites of ulceration in the colon. Linden et al. [58] recently suggested that these efficient catabolic pathways act to keep resting levels of H<sub>2</sub>S in tissue low, thereby enhancing the ‘on demand’ signaling capacity of this molecule. We would speculate that in a circumstance of impaired epithelial barrier function, it is possible that H<sub>2</sub>S derived from luminal bacteria may also influence repair processes, and bacterial products such as endotoxin and butyrate may be a further stimulus for induction of H<sub>2</sub>S-synthesizing enzymes at sites of injury [60,61]. Consistent with this hypothesis, Shen et al. recently reported that germ-free mice have a decreased bioavailability of H<sub>2</sub>S in a range of tissues, including the colon, when compared to mice raised in a specific pathogen-free environment [62]. The mechanism underlying this observation remains unknown.

Our observation that most of the H<sub>2</sub>S produced by colonic tissue is derived via a α-KG-dependent pathway was surprising.

Previous studies have focused on the enzymes CSE and CBS as significant sources of H<sub>2</sub>S synthesis both in healthy and inflamed colonic tissue [25,28,48]. We previously reported that CBS was the major enzymatic source of colonic H<sub>2</sub>S, but this was based largely on our observation that CHH, an inhibitor of CBS, caused a dramatic exacerbation of colitis in rats, that was more profound than was seen with inhibitors of CSE [25]. However, in the present study, using CSE<sup>-/-</sup> and CBS<sup>+/-</sup> mice, we found that CSE was the major source of P5P-dependent H<sub>2</sub>S synthesis in the healthy colon. Moreover, while CHH has been widely used as an inhibitor of CBS and has been shown to suppress P5P-dependent H<sub>2</sub>S synthesis [23,48,63], it also inhibits aminotransferases [62,64], and therefore can block the synthesis of H<sub>2</sub>S that occurs via the CAT-3MST pathway. This was confirmed in the present study. A recent study by Asimakopoulou et al. [65] tested the selectivity of several commonly used putative inhibitors of H<sub>2</sub>S-producing enzymes and concluded that no selective inhibitors of CBS are currently available.

In summary, the CAT-3MST enzymes represent the primary pathway for H<sub>2</sub>S synthesis in the healthy and inflamed colon. Marked increases in colonic H<sub>2</sub>S synthesis, via both P5P-dependent and α-KG-dependent pathways, occur specifically at sites of ulceration. The signals responsible to triggering this up-regulation of H<sub>2</sub>S synthesis are not yet clear. A marked reduction in tissue inactivation of H<sub>2</sub>S also occurs selectively at sites of ulceration. The resulting higher local levels of H<sub>2</sub>S in the microenvironment of the ulcer would act to promote rapid restoration of epithelial barrier integrity. These findings may have important implications with respect to improving treatments for chronic ulcerative conditions of the gastrointestinal tract, including Crohn’s disease and ulcerative colitis.

## Author Contributions

Conceived and designed the experiments: KLF JGPF RW JLW. Performed the experiments: KLF. Analyzed the data: KLF JGPF RW JLW. Contributed reagents/materials/analysis tools: RW JLW. Wrote the paper: KLF JGPF RW JLW.

## References

- Kimura H (2011) Hydrogen sulfide: its production, release and functions. *Amino Acids* 41: 113–121.
- Wang R (2012) Physiological implications of hydrogen sulfide: A whiff exploration that blossomed. *Physiol Rev* 92: 791–896.
- Zhao W, Zhang J, Lu Y, Wang R (2001) The vasorelaxant effect of H<sub>2</sub>S as a novel endogenous gaseous KATP channel opener. *EMBO J* 20: 6008–6016.
- Abe K, Kimura H (1996) The possible role of hydrogen sulfide as an endogenous neuromodulator. *J Neurosci* 16: 1066–1071.
- Distrutti E, Sediari L, Mencarelli A, Renga B, Orlandi S, et al. (2006) Evidence that hydrogen sulfide exerts antinociceptive effects in the gastrointestinal tract by activating KATP channels. *J Pharmacol Exp Ther* 316: 325–335.
- Ekundi-Valentim E, Santos KT, Camargo EA, Denadai-Souza A, Teixeira SA, et al. (2010) Differing effects of exogenous and endogenous hydrogen sulphide in carrageenan-induced knee joint synovitis in the rat. *Br J Pharmacol* 159: 1463–1474.
- Dufton N, Natividad J, Verdu EF, Wallace JL (2012) Hydrogen sulfide and resolution of acute inflammation: A comparative study utilizing a novel fluorescent probe. *Sci Rep* 2: 499
- Wallace JL, Caliendo G, Santagada V, Cirino G, Fiorucci S (2007) Gastrointestinal safety and anti-inflammatory effects of a hydrogen sulfide-releasing diclofenac derivative in the rat. *Gastroenterology* 132: 261–271.
- Zanardo RC, Brancalene V, Distrutti E, Fiorucci S, Cirino G, et al. (2006) Hydrogen sulfide is an endogenous modulator of leukocyte-mediated inflammation. *FASEB J* 20: 2118–2120.
- Fiorucci S, Orlandi S, Mencarelli A, Caliendo G, Santagada V, et al. (2007) Enhanced activity of a hydrogen sulphide-releasing derivative of mesalazine (ATB-429) in a mouse model of colitis. *Br J Pharmacol* 150: 996–1002
- Li L, Salto-Tellez M, Tan CH, Whiteman M, Moore PK (2009) GYY4137, a novel hydrogen sulfide-releasing molecule, protects against endotoxic shock in the rat. *Free Radic Biol Med* 47: 103–113.
- Li L, Whiteman M, Guan Y, Neo KL, Cheng Y, et al. (2008) Characterisation of a novel, water soluble hydrogen sulfide releasing molecule (GYY4137): new insights into the biology of hydrogen sulphide. *Circulation* 117: 2351–2360.
- Szabó C (2007) Hydrogen sulphide and its therapeutic potential. *Nat Rev Drug Discov* 6: 917–935.
- Wallace JL, Caliendo G, Santagada V, Cirino G (2010) Markedly reduced toxicity of a hydrogen sulfide-releasing derivative of naproxen (ATB-346). *Br J Pharmacol* 159: 1236–1246.
- Wallace JL (2007) Hydrogen sulfide-releasing anti-inflammatory drugs. *Trends Pharmacol Sci* 28: 501–505.
- Chattopadhyay M, Kodala R, Nath N, Dastagirzada YM, Velasquez-Martinez CA, et al. (2012) Hydrogen sulfide-releasing NSAIDs inhibit the growth of human cancer cells: a general property and evidence of a tissue type-independent effect. *Biochem Pharmacol* 83: 715–722.
- Caliendo G, Cirino G, Santagada V, Wallace JL (2010) Synthesis and biological effects of hydrogen sulfide (H<sub>2</sub>S): development of H<sub>2</sub>S-releasing drugs as pharmaceuticals. *J Med Chem* 53: 6275–6286.
- Hosoki R, Matsuki N, Kimura H (1997) The possible role of hydrogen sulfide as an endogenous smooth muscle relaxant in synergy with nitric oxide. *Biochem Biophys Res Commun* 237: 527–531.
- Teague B, Asiedu S, Moore PK (2002) The smooth muscle relaxant effect of hydrogen sulphide in vitro: evidence for a physiological role to control intestinal contractility. *Br J Pharmacol* 137: 139–145.
- Ise F, Takasuka H, Hayashi S, Takahashi K, Koyama M, et al. (2011) Stimulation of duodenal HCO<sub>3</sub><sup>-</sup> secretion by hydrogen sulphide in rats: relation to prostaglandins, nitric oxide and sensory neurons. *Acta Physiol* 201: 117–126.
- Pouokam E, Diener M (2011) Mechanisms of actions of hydrogen sulphide on rat distal colonic epithelium. *Br J Pharmacol* 162: 392–404.
- Schicho R, Krueger D, Zeller F (2006) Hydrogen sulfide is a novel prosecretory neuromodulator in the guinea-pig and human colon. *Gastroenterology* 131: 1542–1552.



23. Fiorucci S, Antonelli T, Distrutti E, Rizzo G, Mancarelli A, et al. (2005) Inhibition of hydrogen sulfide generation contributes to gastric injury caused by anti-inflammatory nonsteroidal drugs. *Gastroenterology* 129: 1210–1224.
24. Wallace JL (2010) Physiological and pathophysiological roles of hydrogen sulfide in the gastrointestinal tract. *Antioxid Redox Signal* 12: 1125–1133.
25. Wallace JL, Vong L, McKnight W, Dicay M, Martin GR (2009) Endogenous and exogenous hydrogen sulfide promotes resolution of colitis in rats. *Gastroenterology* 137: 569–578.
26. Wallace JL, Ferraz JGP, Muscara MN (2012) Hydrogen sulfide: an endogenous mediator of resolution of inflammation and injury. *Antioxid Redox Signal* 17: 58–67.
27. Wallace JL, Dicay M, McKnight W, Martin GR (2007) Hydrogen sulfide enhances ulcer healing in rats. *FASEB J* 21: 4070–4076.
28. Hirata I, Naito Y, Takagi T, Mizushima K, Suzuki T, et al. (2011) Endogenous hydrogen sulfide is an anti-inflammatory molecule in dextran sodium sulfate-induced colitis in mice. *Dig Dis Sci* 56: 1379–1386.
29. Matsunami M, Kirishi S, Okui T, Kawabata A (2012) Hydrogen sulfide-induced colonic mucosal cytoprotection involves T-type calcium channel-dependent neuronal excitation in rats. *J Physiol Pharmacol* 63: 61–18.
30. Goubern M, Andriamihaja M, Nübel T, Blachier F, Bouillaud F (2007) Sulfide, the first inorganic substrate for human cells. *FASEB J* 21: 1699–1706.
31. Blachier F, Davila A, Mimoun S, Benetti P, Atanasiu C, et al. (2010) Luminal sulfide and large intestine mucosa: friend or foe? *Amino Acids* 39: 335–347, 2010.
32. Theissen U, Hoffmeister M, Grieshaber M, Martin W (2003) Single eubacterial origin of eukaryotic sulfide:quinone oxidoreductase, a mitochondrial enzyme conserved from the early evolution of eukaryotes during anoxic and sulfidic times. *Mol Biol Evol* 20: 1564–1574.
33. Elrod JW, Calvert JW, Morrison J, Doeller JE, Kraus DW, et al. (2007) Hydrogen sulfide attenuates myocardial ischemia-reperfusion injury by preservation of mitochondrial function. *Proc Natl Acad Sci U S A* 104: 15560–15565.
34. Fu M, Zhang W, Wu L, Yang G, Li H, et al. (2012) Hydrogen sulfide (H<sub>2</sub>S) metabolism in mitochondria and its regulatory role in energy production. *Proc Natl Acad Sci U S A* 109: 2943–2948.
35. Kimura Y, Goto Y, Kimura H (2010) Hydrogen sulfide increases glutathione production and suppresses oxidative stress in mitochondria. *Antioxid Redox Signal* 12: 1–13.
36. Flammigan KL, McCoy KD, and Wallace JL (2011) Eukaryotic and prokaryotic contributions to colonic hydrogen sulfide synthesis. *Am J Physiol Gastrointest Liver Physiol* 301: G188–G193.
37. Shibuya N, Mikami Y, Kimura Y, Nagahara N, Kimura H (2009) Vascular endothelium expresses 3-mercaptopyruvate sulfurtransferase and produces hydrogen sulfide. *J Biochem* 146: 623–626.
38. Shibuya N, Tanaka M, Yoshida M, Ogasawara Y, Togawa T, et al. (2009) 3-mercaptopyruvate sulfurtransferase produces hydrogen sulfide and bound sulfane sulfur in the brain. *Antioxid Redox Signal* 11: 703–714.
39. Yang G, Wu L, Jiang B, Yang W, Qi J, et al. (2008) H<sub>2</sub>S as a physiologic vasorelaxant: hypertension in mice with deletion of cystathionine gamma-lyase. *Science* 322: 587–590.
40. Watanabe M, Osada J, Aratani Y, Kluckman K, Reddick R, et al. (1995) Mice deficient in cystathionine beta-synthase: animal models for mild and severe homocysteinemia. *Proc Natl Acad Sci U S A* 92: 1585–1589.
41. Wallace JL, Le T, Carter L, Appleyard CB, Beck PL (1995) Hapten-induced chronic colitis in the rat: Alternatives to trinitrobenzene sulfonic acid. *J Pharmacol Toxicol Methods* 33: 237–239.
42. Morris GP, Beck PL, Herridge MS, Depew WT, Szwczuk MR, et al. (1989) Hapten-induced model of chronic inflammation and ulceration in the rat colon. *Gastroenterology* 96: 795–803.
43. Boughton-Smith NK, Wallace JL, Whittle BJ (1988) Relationship between arachidonic acid metabolism, myeloperoxidase activity and leukocyte infiltration in a rat model of inflammatory bowel disease. *Agents Actions* 25: 115–123.
44. Bradley PP, Probat DA, Christensen RD, Rothstein G (1982) Measurement of cutaneous inflammation: estimation of neutrophil content with an enzyme marker. *J Invest Dermatol* 78: 206–209.
45. Lowie BJ, Wang XY, White EJ, Huizinga JD (2011) On the origin of rhythmic calcium transients in the ICC-MP of the mouse small intestine. *Am J Physiol Gastrointest Liver Physiol* 301: G835–G845.
46. Stipanuk MH, Beck PW (1982) Characterization of the enzymic capacity for cysteine desulphydration in liver and kidney of the rat. *Biochem J* 206: 267–277.
47. Linden DR, Sha L, Mazzone A, Stoltz GJ, Bernard CE, et al. (2008) Production of the gaseous signal molecule hydrogen sulfide in mouse tissues. *J Neurochem* 106: 1577–1585.
48. Martin GR, McKnight GW, Dicay MS, Coffin CS, Ferraz JG, et al. (2010) Hydrogen sulphide synthesis in the rat and mouse gastrointestinal tract. *Dig Liver Dis* 42: 103–109.
49. Fiorucci S, Distrutti E, Cirino G, Wallace JL (2006) The emerging roles of hydrogen sulfide in the gastrointestinal tract and liver. *Gastroenterology* 131: 259–271.
50. Blackler R, Syer S, Bolla M, Ongini E, Wallace JL (2012) Gastrointestinal-sparing effects of novel NSAIDs in rats with compromised mucosal defence. *PLoS One* 7: e35196.
51. Pictor R, Eggo MC, Merrill GA, Langman MJ, Singh S (2002) Mucosal protection against sulphide: importance of the enzyme rhodanese. *Gut* 50: 201–205.
52. Papapetropoulos A, Pyriochou A, Altaany Z, Yang G, Marazioti A, et al. (2009) Hydrogen sulfide is an endogenous stimulator of angiogenesis. *Proc Natl Acad Sci U S A* 106: 21972–21977.
53. Mizuno H, Sakamoto C, Matsuda K, Wada K, Uchida T, et al. (1997) Induction of cyclooxygenase 2 in gastric mucosal lesions and its inhibition by the specific antagonist delays healing in mice. *Gastroenterology* 112: 387–397.
54. Ma L, Wallace JL (2000) Endothelial nitric oxide synthase modulates gastric ulcer healing in rats. *Am J Physiol Gastrointest Liver Physiol* 279: G341–G346.
55. Szabo S, Vincze A, Sandor Z, Jadus M, Gombos Z, et al. (1998) Vascular approach to gastroduodenal ulceration: new studies with endothelins and VEGF. *Dig Dis Sci* 43: 40S–45S.
56. Lagoutte E, Mimoun S, Andriamihaja M, Chaumontet C, Blachier F, et al. (2010) Oxidation of hydrogen sulfide remains a priority in mammalian cells and causes reverse electron transfer in colonocytes. *Biochim Biophys Acta* 1797: 1500–1511.
57. Mimoun S, Andriamihaja M, Chaumontet C, Atanasiu C, Benamouzig R, et al. (2012) Detoxification of H<sub>2</sub>S by differentiated colonic epithelial cells: implication of the sulfide oxidizing unit and of the cell respiratory capacity. *Antioxid Redox Signal* 17: 1–10.
58. Linden DR, Furne J, Stoltz GJ, Abdel-Rehim MS, Levitt MD, et al. (2012) Sulphide quinone reductase contributes to hydrogen sulphide metabolism in murine peripheral tissues but not in the CNS. *Br J Pharmacol* 165: 2178–2190.
59. Mimoun S, Andriamihaja M, Chaumontet C, Atanasiu C, Benamouzig R, et al. (2012) Detoxification of H<sub>2</sub>S by differentiated colonic epithelial cells: implication of the sulfide oxidizing unit and of the cell respiratory capacity. *Antioxid Redox Signal* 17: 1–10.
60. Cao Q, Zhang L, Yang G, Xu C, Wang R (2010) Butyrate-stimulated H<sub>2</sub>S production in colon cancer cells. *Antioxid Redox Signal* 12: 1101–1109.
61. Collin M, Anuar FB, Murch O, Bhatia M, Moore PK, et al. (2005) Inhibition of endogenous hydrogen sulfide formation reduces the organ injury caused by endotoxemia. *Br J Pharmacol* 146: 498–505.
62. Shen X, Carlström M, Borniquel S, Jädert C, Kevil CG, et al. (2013) Microbial regulation of host hydrogen sulfide bioavailability and metabolism. *Free Radic Biol Med* 60: 195–200.
63. Whiteman M, Winyard PG (2011) Hydrogen sulfide and inflammation: the good, the bad, the ugly and the promising. *Expert Rev Clin Pharmacol* 41: 13–32.
64. Cornell NW (1984) Selective inhibition of alanine amino transferase and aspartate aminotransferase in rat hepatocytes. *Biochem J* 220: 707–716.
65. Asimakopoulou A, Panopoulos P, Chasapis CT, Coletta C, Zhou Z, et al. (2013) Selectivity of commonly used pharmacological inhibitors for cystathionine beta synthase (CBS) and cystathionine gamma lyase (CSE). *Br J Pharmacol*
